# Supplementary material for: Effect of Nano Spinel Ferrites Co0.9Cu0.1Fe2O4 on Non-Isothermal Cold Crystallization Behaviours and Kinetics of Its Composites with Polylactic Acid
Source: MDPI journal article supplement (doi:10.3390/polym16091190), 2024-04-24
Supplement: s1 [file s1]

**Effect of Nanospinel Ferrites  $\text{Co}_{0.9}\text{Cu}_{0.1}\text{Fe}_2\text{O}_4$  on Nonisothermal Cold Crystallization Behaviours and kinetics of its Composites with Poly(Lactic Acid).**

**Wael H Alsaedi <sup>1</sup>, Khulood A. Abu Al-Ola <sup>1</sup>, Omaila Alhaddad <sup>1</sup>, Zyzafon Albelwe  
<sup>1</sup>, Renad Alawaji <sup>1</sup> and Ahmed M. Abu-Dief\* <sup>1,2</sup>**

<sup>1</sup> Department of Chemistry, College of Science, Taibah University, 30002 Al-Madinah Al-Munawarah, Saudi Arabia.

<sup>2</sup> Department of Chemistry, Faculty of Science, Sohag University, Sohag 82524, Egypt

Corresponding author e-mail: [amamohammed@taibahu.edu.sa](mailto:amamohammed@taibahu.edu.sa) (Ahmed M. Abu-Dief)

Supporting information

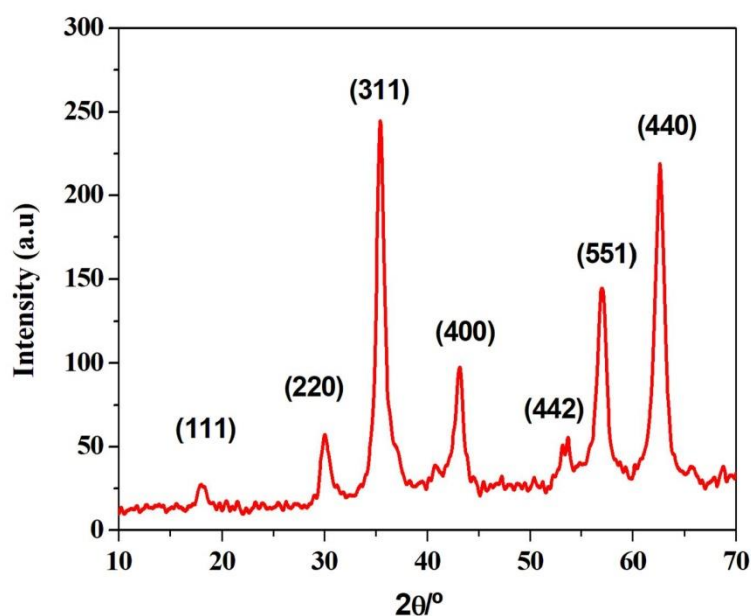

**Figure S1.** : X-ray diffraction (XRD) lines of the investigated  $\text{Cu}_{0.1}\text{Co}_{0.9}\text{Fe}_2\text{O}_4$  nanoparticles.

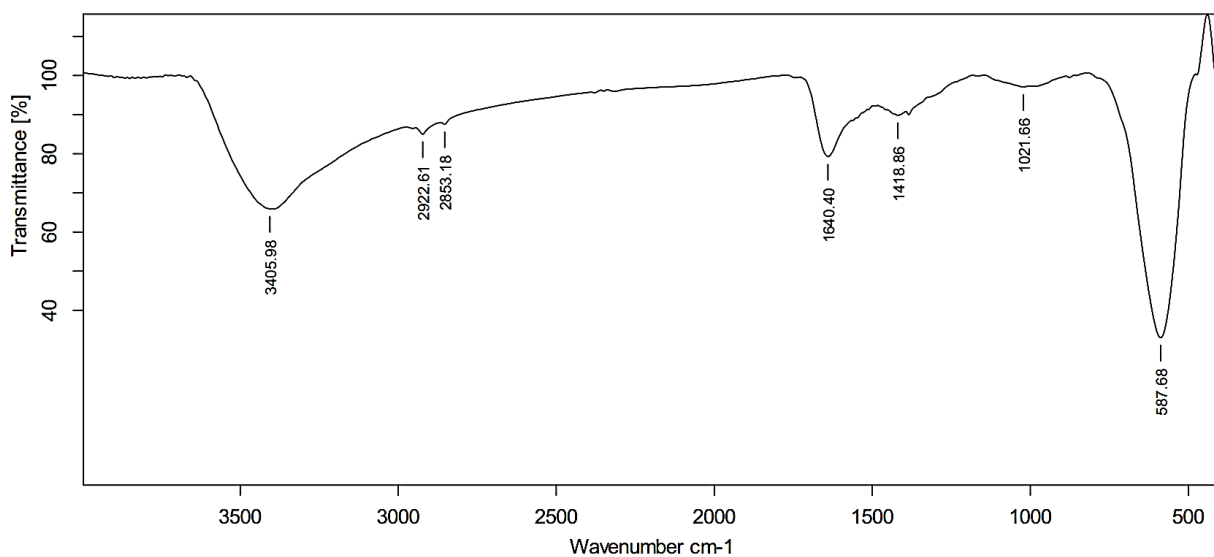

**Fig. S2:** The infrared transmittance spectra of the investigated  $\text{Cu}_{0.1}\text{Co}_{0.9}\text{Fe}_2\text{O}_4$  nanoparticles.

**Table S1.** EDXS analytical study for the compositional elements in the nuclear % (at. %) of  $[\text{Cu}_{0.1}\text{Co}_{0.9}\text{Fe}_2\text{O}_4]$  mixed nano spinel ferrites.

| Element                       | Elements in atomic percentage (at. %) |       |       |       | Total % |
|-------------------------------|---------------------------------------|-------|-------|-------|---------|
|                               | Cu                                    | Co    | Fe    | O     |         |
| <b>Theoretical (Expected)</b> | 1.53                                  | 13.56 | 30.11 | 54.80 | 100     |
| <b>Experimental (Actual)</b>  | 1.57                                  | 12.67 | 30.64 | 55.10 | 99.98   |
